# Supplementary material for: IL-1R/C3aR signaling regulates synaptic pruning in the prefrontal cortex of depression
Source: PubMed Central journal article supplement (PMC9205119; doi:10.1186/s13578-022-00832-4), 2022-06-17
Supplement: 13578_2022_832_MOESM1_ESM.pdf [file 13578_2022_832_MOESM1_ESM.pdf]

*Supplementary file*

**IL-1R/C3aR signaling regulates synaptic pruning in the prefrontal cortex of depression**

Man-Man Zhang<sup>1</sup>, Min-Xia Guo<sup>2</sup>, Qiu-Ping Zhang<sup>3</sup>, Xue-Qin Chen<sup>4</sup>, Na-Zhi Li<sup>2</sup>, Qing Liu<sup>1</sup>,

Jie Cheng<sup>1</sup>, Shi-Le Wang<sup>1</sup>, Guang-Hui Xu<sup>5</sup>, Cheng-Fu Li<sup>3</sup>, Ji-Xiao Zhu<sup>2,\*\*</sup>, Li-Tao Yi<sup>1,\*</sup>

<sup>1</sup>*Department of Chemical and Pharmaceutical Engineering, College of Chemical Engineering, Huaqiao University, Xiamen 361021, Fujian province, PR China*

<sup>2</sup>*Research Center of Natural Resources of Chinese Medicinal Materials and Ethnic Medicine, Jiangxi University of Chinese Medicine, Nanchang 330004, Jiangxi province, PR China*

<sup>3</sup>*Xiamen Hospital of Traditional Chinese Medicine, Xiamen 361009, Fujian province, PR China*

<sup>4</sup>*The First Affiliated Hospital of Xiamen University, Xiamen 361003, Fujian province, PR China*

<sup>5</sup>*Xiamen Medicine Research Institute, Xiamen 361008, Fujian province, PR China*

**Corresponding authors:**

\*Li-Tao Yi. Tel./Fax.: 86-592-6162300; *E-mail address:* [litaoyi@hqu.edu.cn](mailto:litaoyi@hqu.edu.cn) [ORCID: 0000-](https://orcid.org/0000-0001-9052-8607)

[0001-9052-8607](https://orcid.org/0001-9052-8607)

\*\*Ji-Xiao Zhu. Tel/Fax: 86- 791-87119065; *E-mail address:* [zhujx81@sina.com](mailto:zhujx81@sina.com)

**Running title:** IL-1R/C3aR mediates synaptic pruning in depression

**Table 1 Primary antibodies information**

| <b>Antibody</b>      | <b>Host</b> | <b>Company</b> | <b>Lot Number</b> | <b>Application</b> | <b>Dilution</b>           |
|----------------------|-------------|----------------|-------------------|--------------------|---------------------------|
| Iba1                 | Goat        | Abcam          | ab5076            | IF                 | 1:200                     |
| C3                   | Rabbit      | Abcam          | ab97462           | IF<br>WB           | 1:150(IF);<br>1:1000 (WB) |
| C3aR                 | Mouse       | Santa Cruz     | sc133172          | IF                 | 1:150(IF);<br>1:1000 (WB) |
| PSD95                | Rabbit      | Abcam          | ab18258           | IF<br>WB           | 1:100(IF);<br>1:1000 (WB) |
| PSD95                | Mouse       | CST            | 36233S            | IF                 | 1:100                     |
| Synaptophysin        | Rabbit      | CST            | 36406             | IF<br>WB           | 1:100(IF);<br>1:1000 (WB) |
| Synaptophysin        | Mouse       | Santa Cruz     | sc17750           | IF                 | 1:100                     |
| pSTAT3               | Rabbit      | Abcam          | ab76315           | IF<br>WB           | 1:100(IF);<br>1:1000 (WB) |
| STAT3                | Mouse       | Abcam          | 9139S             | IF<br>WB           | 1:100(IF);<br>1:1000 (WB) |
| APT2                 | Mouse       | Santa Cruz     | sc515061          | IF<br>WB           | 1:100(IF);<br>1:1000 (WB) |
| DHHC7                | Rabbit      | ThermoFisher   | PA5-63760         | IF<br>WB           | 1:100(IF);<br>1:1000 (WB) |
| IL-1R1               | Mouse       | Santa Cruz     | sc-393998         | IF<br>WB           | 1:100(IF);<br>1:1000 (WB) |
| p-NF- $\kappa$ B p65 | Rabbit      | Abcam          | ab86299           | IF<br>WB           | 1:100(IF);<br>1:1000 (WB) |
| NF- $\kappa$ B p65   | Rabbit      | Abcam          | ab16502           | WB                 | 1:1000                    |
| GFAP                 | Mouse       | Santa Cruz     | sc-33673          | IF                 | 1:150                     |
| GFAP                 | Rabbit      | Abcam          | ab207165          | IF                 | 1:200                     |
| NeuN                 | Rat         | Abcam          | ab279297          | IF                 | 1:200                     |
| $\beta$ -actin       | Rabbit      | Sigma          | A3854             | WB                 | 1:5000                    |

**Table S2 Primers used in PCR**

---

| <b>Gene</b>   | <b>Forward</b>              | <b>Reverse</b>               |
|---------------|-----------------------------|------------------------------|
| IL-1 $\beta$  | 5'-TGCCACCTTTTGACAGTGATG-3' | 5'-TGATGTGCTGCTGCGAGATT-3'   |
| IL-6          | 5'-CCCCAATTTCCAATGCTCTCC-3' | 5'-CGCACTAGGTTTGCCGAGTA-3'   |
| TNF- $\alpha$ | 5'-GATCGGTCCCCAAAGGGATG-3'  | 5'-CCACTTGGTGGTTTGTGAGTG-3'  |
| GAPDH         | 5'-TGAGGCCGGTGCTGAGTATGT-3' | 5'-CAGTCTTCTGGGTGGCAGTGAT-3' |

---

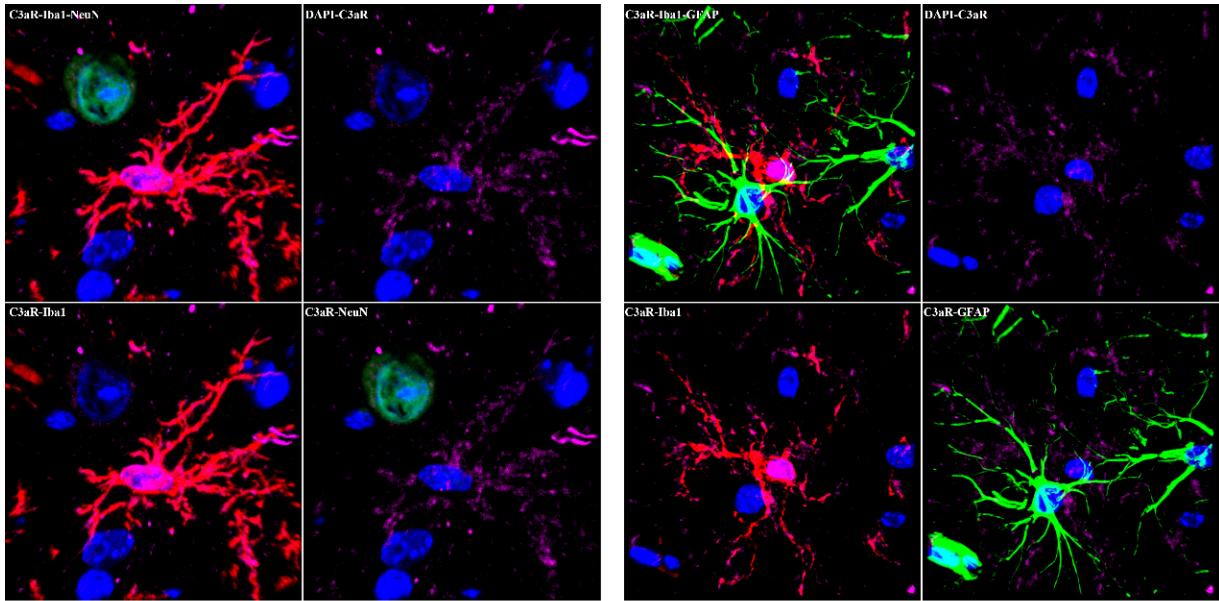

**Figure S1** C3aR is highly expressed in microglia, lowly expressed in neuron, but not expressed in astrocyte
